# Supplementary material for: On the energetic and magnetic stability of neutral and charged lithium clusters doped with one and two yttrium atoms
Source: Royal Society of Chemistry journal article supplement (doi:10.1039/d3cp00128h), 2023-01-01

${}^2\text{YLi}^+$ 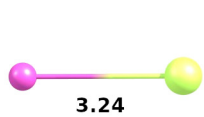 ${}^3\text{YLi}_2^+$ 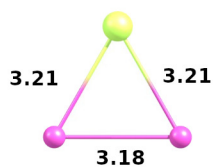 ${}^4\text{YLi}_3^+$ 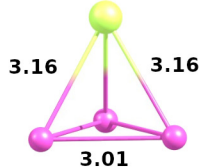 ${}^3\text{YLi}_4^+$ 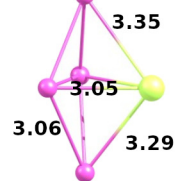 ${}^2\text{YLi}_5^+$ 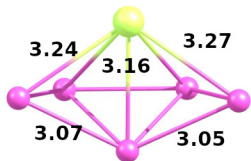 ${}^1\text{YLi}_6^+$ 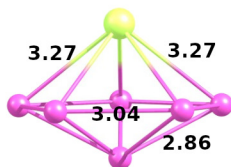 ${}^2\text{YLi}_7^+$ 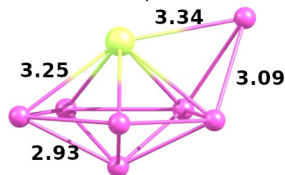 ${}^3\text{YLi}_8^+$ 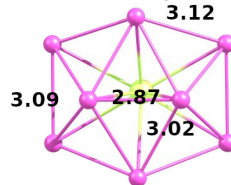 ${}^2\text{YLi}_9^+$ 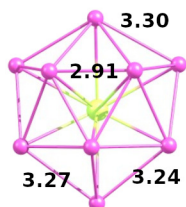 ${}^3\text{YLi}_{10}^+$ 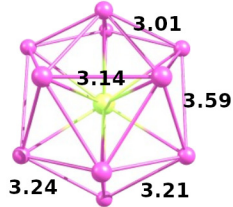 ${}^2\text{YLi}_{11}^+$ 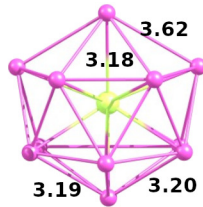 ${}^5\text{YLi}_{12}^+$ 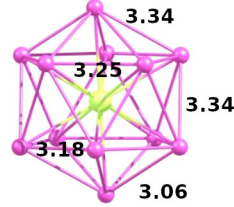 ${}^4\text{YLi}_{13}^+$ 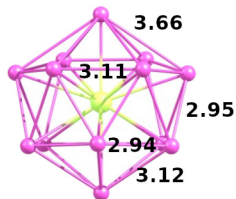 ${}^1\text{YLi}_{14}^+$ 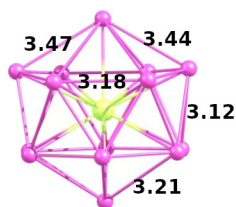 ${}^2\text{YLi}_{15}^+$ 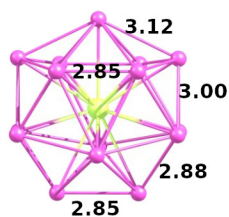 ${}^1\text{YLi}_{16}^+$ 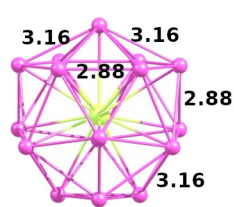 ${}^2\text{YLi}_{17}^+$ 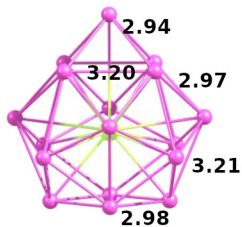 ${}^1\text{YLi}_{18}^+$ 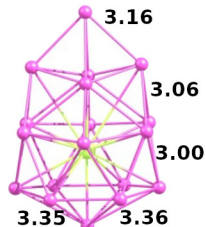 ${}^2\text{YLi}_{19}^+$ 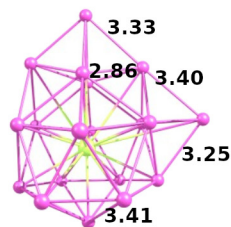 ${}^1\text{YLi}_{20}^+$ 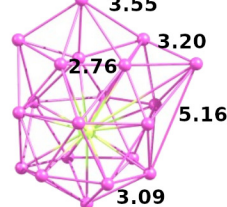 ${}^2\text{YLi}_{21}^+$ 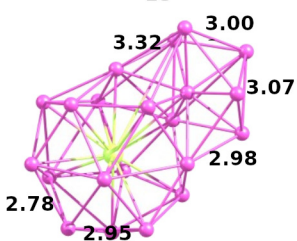 ${}^3\text{YLi}_{22}^+$ 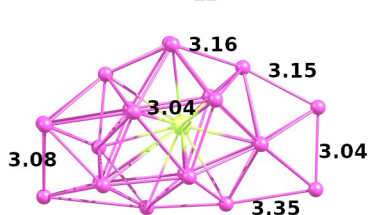 ${}^2\text{YLi}_{23}^+$ 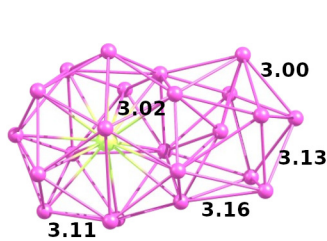 ${}^1\text{YLi}_{24}^+$ 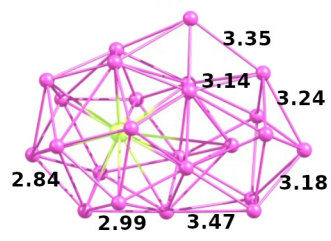

Supplement: d3cp00128h2.zip [file d3cp00128h2.zip]
