# Supplementary material for: On the energetic and magnetic stability of neutral and charged lithium clusters doped with one and two yttrium atoms
Source: Royal Society of Chemistry journal article supplement (doi:10.1039/d3cp00128h), 2023-01-01
Supplement: d3cp00128h1.pdf [file d3cp00128h1.pdf]

## On the energetic and magnetic stability of neutral and charged lithium clusters doped with one and two yttrium atoms

Henry Nicole González-Ramírez,<sup>\*a</sup> Héctor Xólotl Silos Vega,<sup>a</sup> Zeferino Gómez-Sandoval,<sup>a</sup> Roberto Flores-Moreno,<sup>b</sup> Osvaldo Yáñez,<sup>c</sup> Kayim Pineda-Urbina,<sup>a</sup> Juan Pablo Mojica-Sánchez,<sup>d</sup> and José Manuel Flores-Álvarez<sup>a</sup>

### Supplementary information

---

<sup>a</sup> Facultad de Ciencias Químicas, Universidad de Colima, Km. 9 Carretera Colima-Coquimatlán s/n, 28400, Coquimatlán, Colima, México. E-mail: henrygonzalezr@gmail.com

<sup>b</sup> Departamento de Química, Universidad de Guadalajara, Blvd. Gral. Marcelino García Barragán 1421, Col. Olímpica, 44430, Guadalajara, Jalisco, México

<sup>c</sup> Núcleo de Investigación de Data Science, Facultad de Ingeniería y Negocios, Universidad de las Américas, 7500000, Santiago, Chile

<sup>d</sup> Instituto Tecnológico José Mario Molina Pasquel y Henríquez, Campus Tamazula de Gordiano, Carretera Tamazula-Santa Rosa No. 329, 49650, Tamazula de Gordiano, Jalisco, México



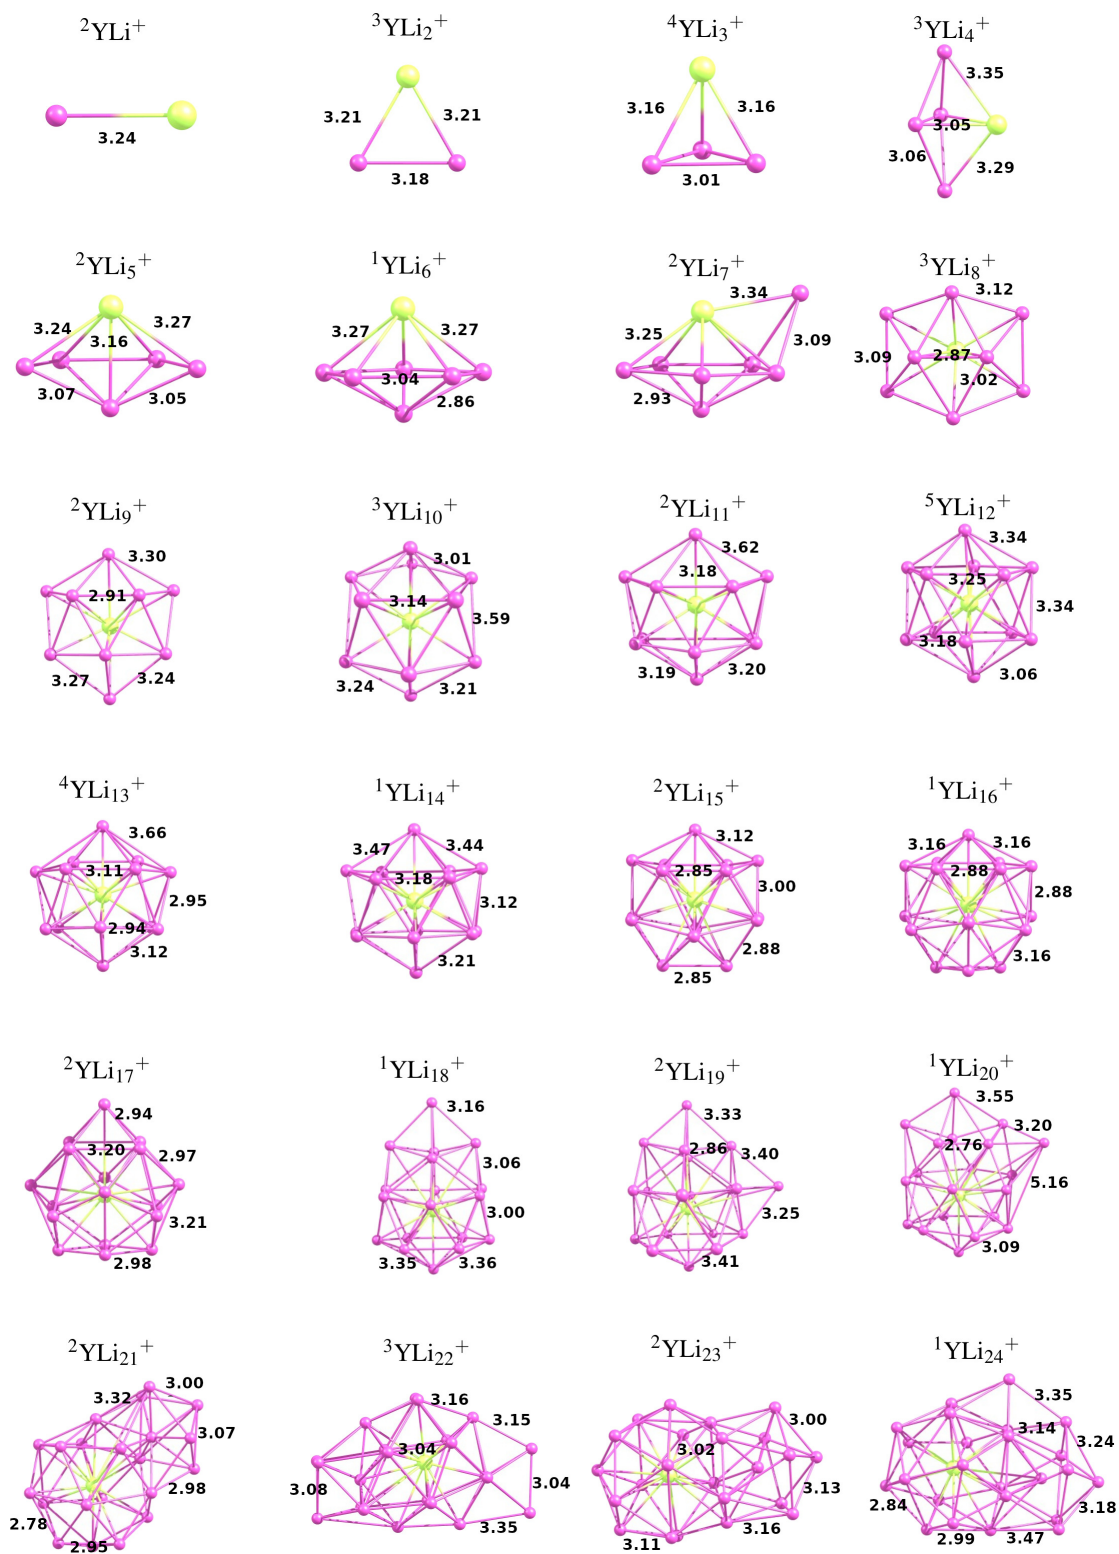

Fig. S1 Ground-state geometries of  $\text{YLi}_n^+$  clusters for  $n = 1 - 24$ . The superscripts indicate spin multiplicity. Selected bond lengths are given in angstroms.

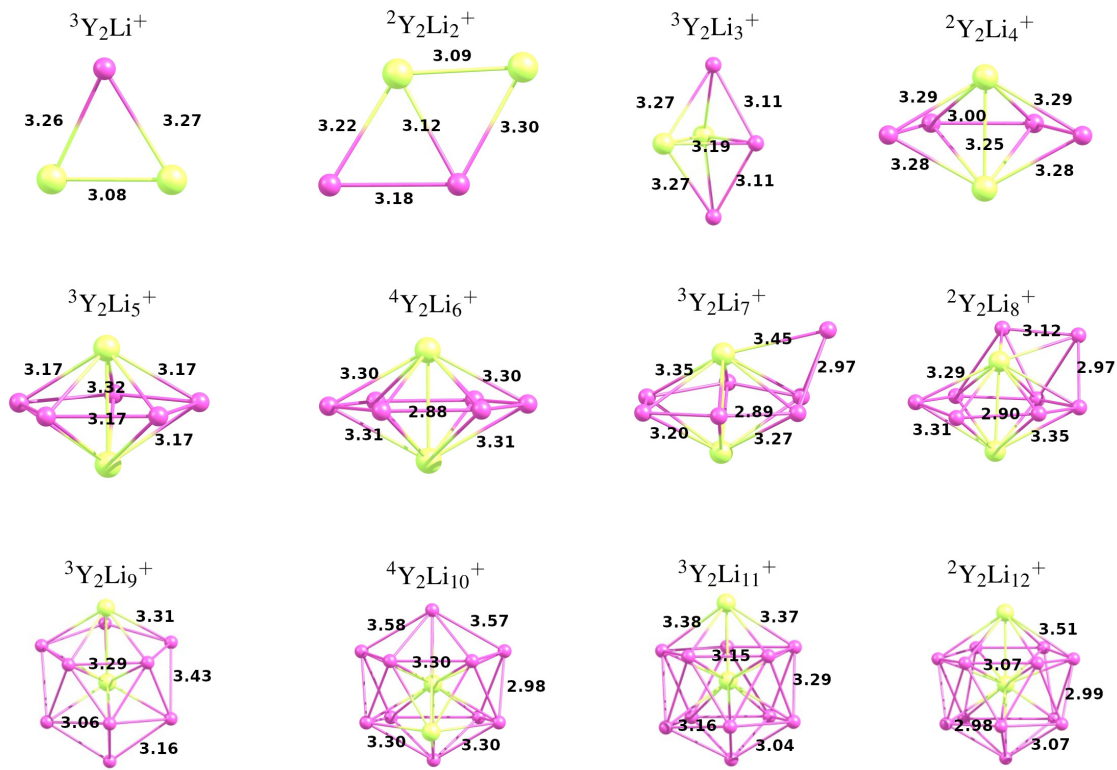

Fig. S2 Ground-state geometries of  $Y_2Li_n^+$  clusters for  $n = 1 - 12$ . The superscripts indicate spin multiplicity. Selected bond lengths are given in angstroms.

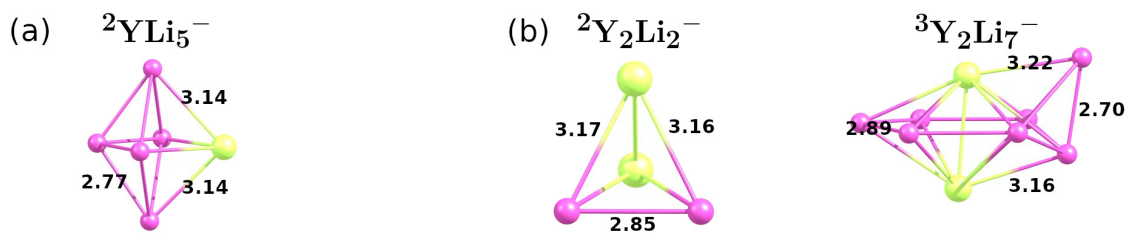

Fig. S3 Ground state geometries for (a) the  $YLi_5^-$  anion cluster, whose geometry is similar to the neutral case, but different from the cation, and (b) the  $Y_2Li_2^-$  and  $Y_2Li_7^-$  anion clusters, whose geometries are similar to the neutral case, but different from the cation. The superscripts indicate spin multiplicity. Selected bond lengths are given in angstroms.

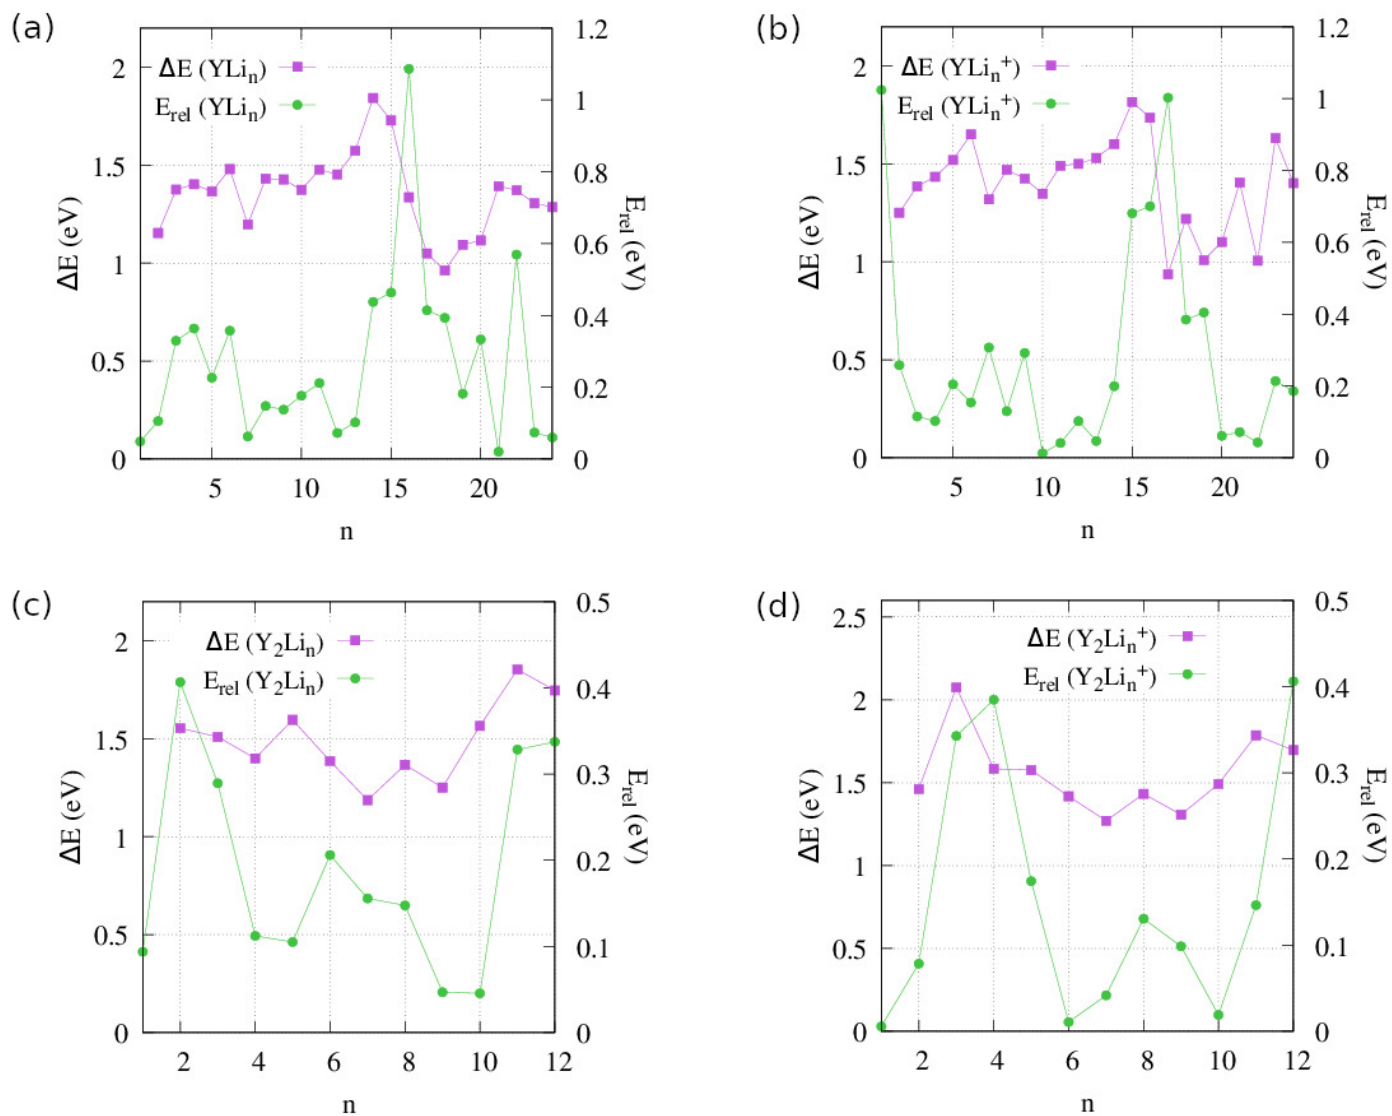

Fig. S4 Variation in the energy gain  $\Delta E$  and relative energy to the lowest isomer of different spin multiplicity ( $E_{rel}$ ) with the number of alkali Li atoms in: (a) the  $YLi_n$  ( $n = 1 - 24$ ) clusters, (b) the  $YLi_n^+$  ( $n = 1 - 24$ ) clusters, (c) the  $Y_2Li_n$  ( $n = 1 - 12$ ) clusters, and (d) the  $Y_2Li_n^+$  ( $n = 1 - 12$ ) clusters. Units are in eV.

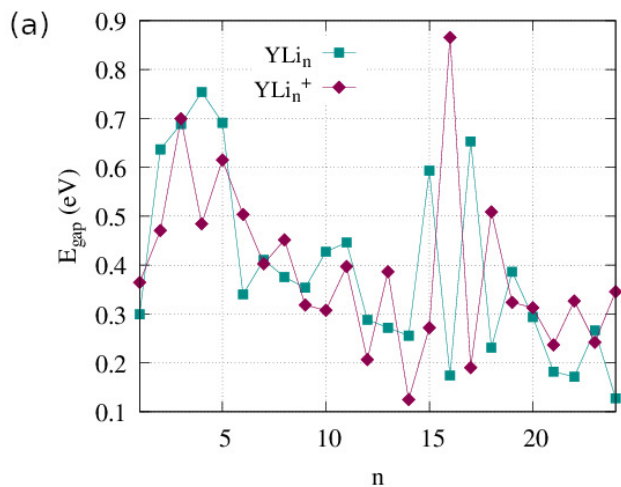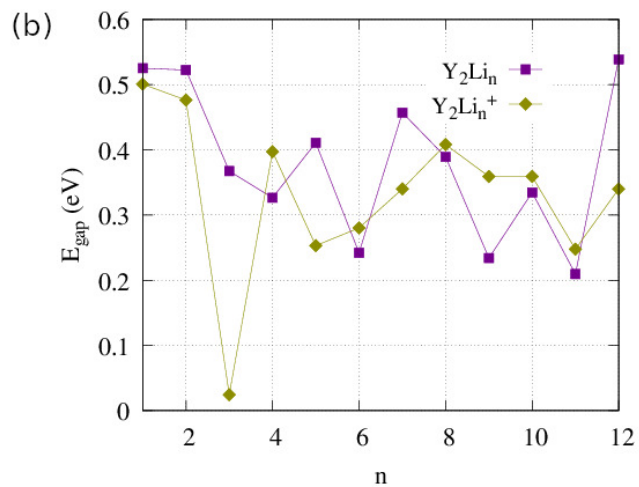

Fig. S5 Variation in the the energy gap: (a) in the  $YLi_n$  clusters and  $YLi_n^+$  clusters, for  $n = 1 - 24$ , (b) in the  $Y_2Li_n$  clusters, and in the  $Y_2Li_n^+$  clusters, for  $n = 1 - 12$ . Units are in eV.

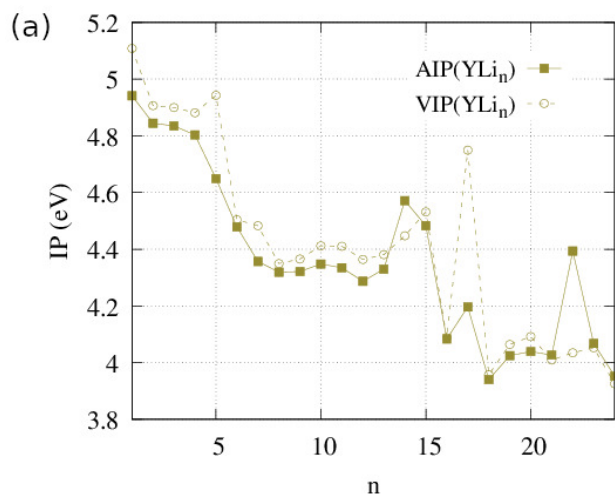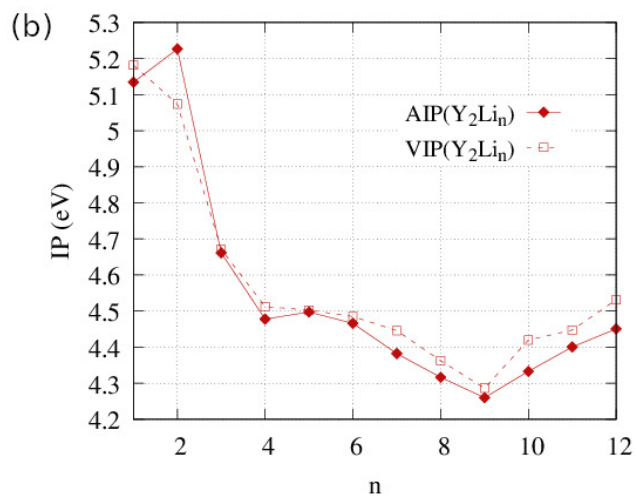

Fig. S6 Adiabatic ionization energies (AIP) and vertical ionization energies (VIP): (a) in  $YLi_n$  clusters ( $n = 1 - 24$ ), (b) in  $Y_2Li_n$  clusters ( $n = 1 - 12$ ). Units are in eV.

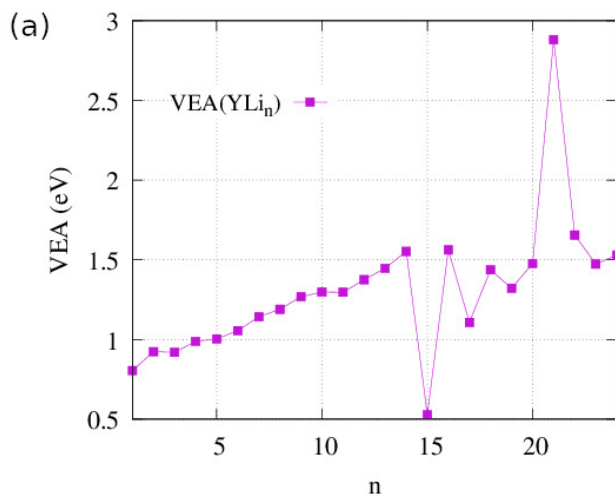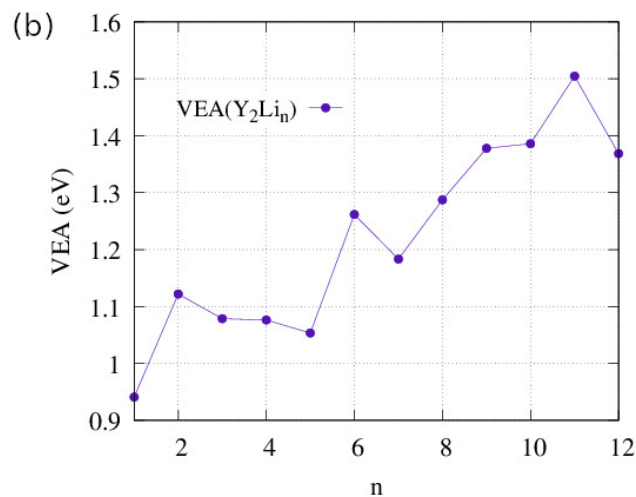

Fig. S7 Vertical electron affinity (VEA): (a) in  $YLi_n$  clusters, (b) in  $Y_2Li_n$  clusters. Units are in eV.



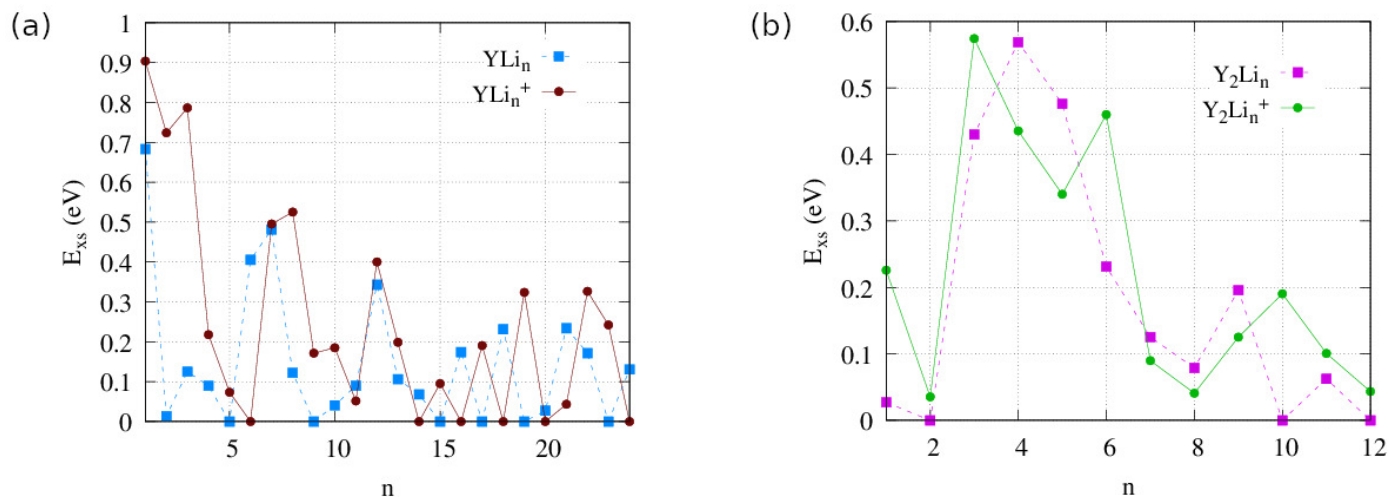

Fig. S8 Exchange-splitting: (a) in the  $YLi_n$  and  $YLi_n^+$  clusters for  $n = 1 - 24$ , (b) in the  $Y_2Li_n$  and  $Y_2Li_n^+$  clusters. Units are in eV.

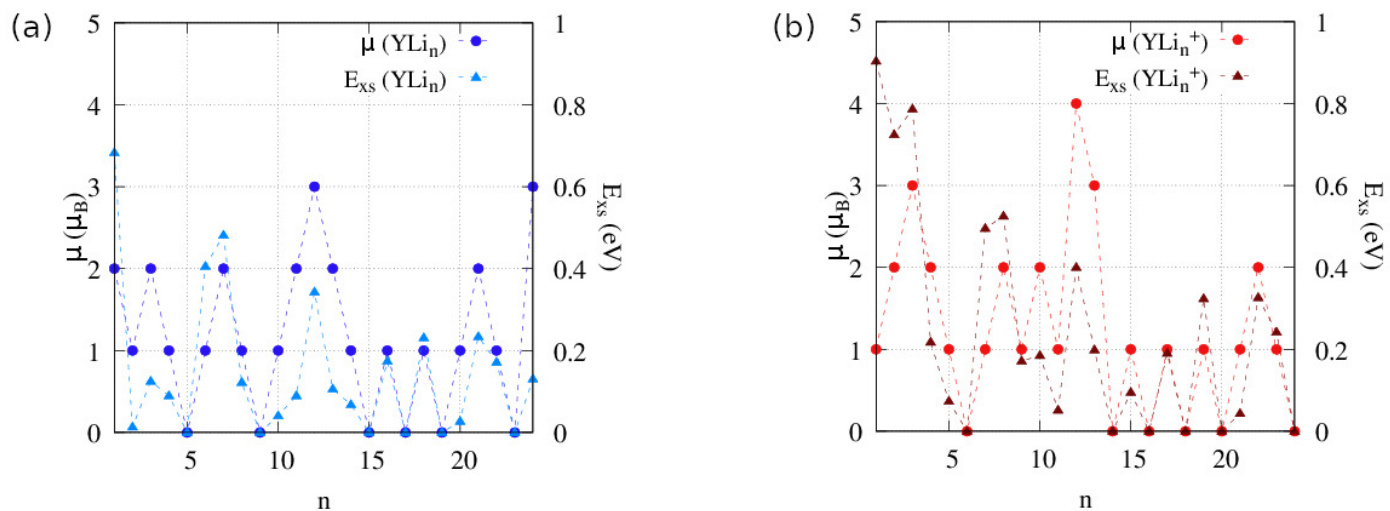

Fig. S9 Correlation between exchange-splitting and magnetic moment for the clusters : (a)  $YLi_n$  ( $n = 1 - 24$ ), (b)  $YLi_n^+$  ( $n = 1 - 24$ ). The units of  $E_{XS}$  are in eV and for  $\mu$  in  $\mu_B$ .

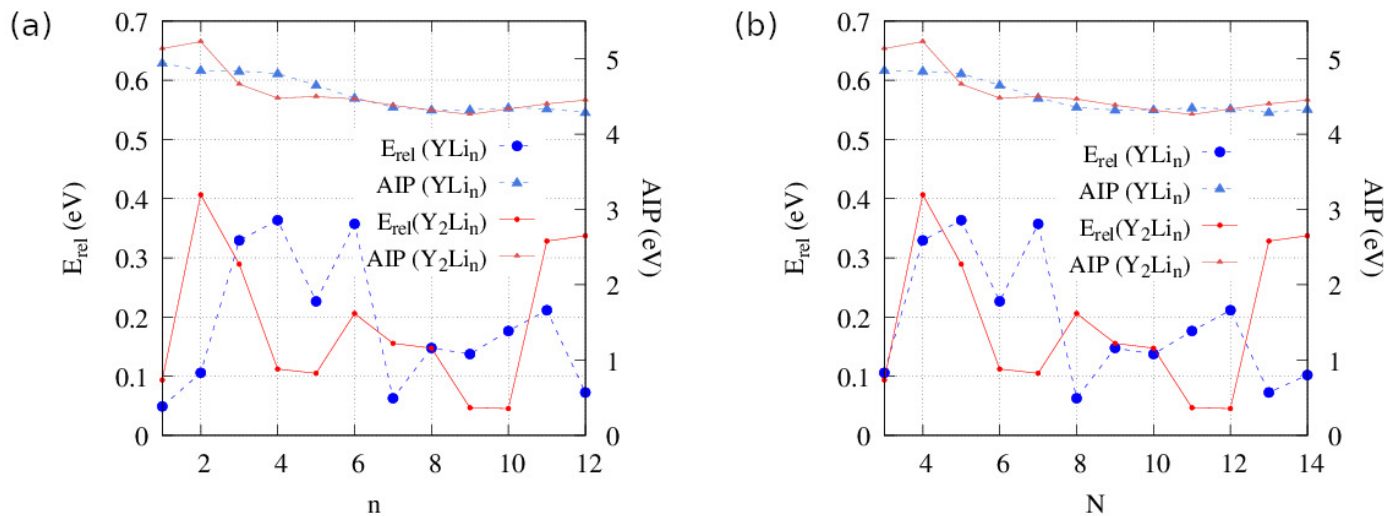

Fig. S10 Correlation in the  $E_{rel}$  values and AIP values for the  $YLi_n$  and  $Y_2Li_n$  clusters, in terms of: (a) the increase in the number  $n$  of lithium atoms, (b) the increase of the number  $N = 3 - 14$  of atoms. Units are in eV.

Table S1. Atomization energy (AE), energy gain ( $\Delta E$ ), exchange splitting  $E_{xs}$ , energy gap ( $E_{gap}$ ) and magnetic moment ( $\mu$ ), for the charged  $YLi_n^+$  ( $n = 1 - 24$ ) clusters and charged  $Y_2Li_n^+$  ( $n = 1 - 12$ ) clusters. The magnetic moment ( $\mu$ ) and relative energy ( $E_{rel}$ ) is given for the lowest energy isomer. For each  $n$ , second line correspond to the case with two Y atoms. The energies are given in eV and the magnetic moment in  $\mu_B$

| n  | Ground state |            |          |           |       | Lowest energy |           |  |
|----|--------------|------------|----------|-----------|-------|---------------|-----------|--|
|    | AE           | $\Delta E$ | $E_{xs}$ | $E_{gap}$ | $\mu$ | $\mu$         | $E_{rel}$ |  |
| 1  | 1.370        |            | 0.903    | 0.365     | 1     | 3             | 1.024     |  |
|    | 3.281        |            | 0.226    | 0.500     | 2     | 4             | 0.006     |  |
| 2  | 2.621        | 1.251      | 0.724    | 0.471     | 2     | 0             | 0.259     |  |
|    | 4.743        | 1.462      | 0.035    | 0.476     | 1     | 3             | 0.078     |  |
| 3  | 4.007        | 1.385      | 0.786    | 0.699     | 3     | 1             | 0.115     |  |
|    | 6.818        | 2.074      | 0.574    | 0.024     | 2     | 0             | 0.343     |  |
| 4  | 5.441        | 1.434      | 0.218    | 0.484     | 2     | 0             | 0.102     |  |
|    | 8.401        | 1.584      | 0.435    | 0.397     | 1     | 3             | 0.385     |  |
| 5  | 6.961        | 1.520      | 0.073    | 0.615     | 1     | 3             | 0.204     |  |
|    | 9.978        | 1.576      | 0.340    | 0.253     | 2     | 0             | 0.174     |  |
| 6  | 8.611        | 1.651      | 0.000    | 0.503     | 0     | 2             | 0.154     |  |
|    | 11.396       | 1.418      | 0.460    | 0.280     | 3     | 1             | 0.011     |  |
| 7  | 9.931        | 1.319      | 0.495    | 0.403     | 1     | 3             | 0.307     |  |
|    | 12.666       | 1.270      | 0.090    | 0.340     | 2     | 0             | 0.042     |  |
| 8  | 11.400       | 1.469      | 0.525    | 0.452     | 2     | 0             | 0.130     |  |
|    | 14.099       | 1.433      | 0.041    | 0.408     | 1     | 3             | 0.130     |  |
| 9  | 12.825       | 1.425      | 0.171    | 0.318     | 1     | 3             | 0.292     |  |
|    | 15.407       | 1.307      | 0.125    | 0.359     | 2     | 0             | 0.099     |  |
| 10 | 14.173       | 1.348      | 0.185    | 0.307     | 2     | 0             | 0.013     |  |
|    | 16.899       | 1.492      | 0.190    | 0.359     | 3     | 1             | 0.019     |  |
| 11 | 15.664       | 1.491      | 0.052    | 0.397     | 1     | 3             | 0.041     |  |
|    | 18.685       | 1.786      | 0.101    | 0.248     | 2     | 0             | 0.146     |  |
| 12 | 17.164       | 1.500      | 0.400    | 0.207     | 4     | 2             | 0.102     |  |
|    | 20.381       | 1.697      | 0.043    | 0.340     | 1     | 3             | 0.406     |  |
| 13 | 18.695       | 1.530      | 0.199    | 0.386     | 3     | 1             | 0.047     |  |
| 14 | 20.297       | 1.602      | 0.000    | 0.125     | 0     | 2             | 0.199     |  |
| 15 | 22.114       | 1.817      | 0.095    | 0.272     | 1     | 3             | 0.681     |  |
| 16 | 23.849       | 1.735      | 0.000    | 0.865     | 0     | 2             | 0.700     |  |
| 17 | 24.786       | 0.937      | 0.190    | 0.190     | 1     | 3             | 1.002     |  |
| 18 | 26.006       | 1.219      | 0.000    | 0.509     | 0     | 4             | 0.385     |  |
| 19 | 27.015       | 1.009      | 0.324    | 0.324     | 1     | 3             | 0.404     |  |
| 20 | 28.117       | 1.102      | 0.000    | 0.313     | 0     | 2             | 0.061     |  |
| 21 | 29.522       | 1.405      | 0.043    | 0.237     | 1     | 3             | 0.072     |  |
| 22 | 30.528       | 1.006      | 0.326    | 0.326     | 2     | 4             | 0.043     |  |
| 23 | 32.159       | 1.631      | 0.242    | 0.242     | 1     | 3             | 0.214     |  |
| 24 | 33.561       | 1.402      | 0.000    | 0.345     | 0     | 2             | 0.185     |  |



Table S2 Ground state superorbital configurations for neutral  $YLi_n$  ( $n = 1 - 24$ ) and  $Y_2Li_n$  ( $n = 1 - 12$ ) clusters, and the charged  $YLi_n^+$  ( $n = 1 - 24$ ) and  $Y_2Li_n^+$  ( $n = 1 - 12$ ) clusters under study

| n  | $YLi_n$                                                | $YLi_n^+$                                                                                           | $Y_2Li_n$                          | $Y_2Li_n^+$                               |
|----|--------------------------------------------------------|-----------------------------------------------------------------------------------------------------|------------------------------------|-------------------------------------------|
| 1  | $1S^2 1P_\alpha^1 1D_\alpha^1$                         | $1S^2 1P_\alpha^1$                                                                                  | $1S^2 1P_\alpha^3 1P_\beta^2$      | $1S^2 1P_\alpha^3 1P_\beta^1$             |
| 2  | $1S^2 1D_\alpha^1 1P_\alpha^1 1P_\beta^1$              | $1S^2 1D_\alpha^1 1P_\alpha^1$                                                                      | $1S^2 1P^6$                        | $1S^2 1P_\alpha^3 1P_\beta^2$             |
| 3  | $1S^2 1P_\alpha^3 1P_\beta^1$                          | $1S^2 1P_\alpha^3$                                                                                  | $1S^2 1P^6 1D_\alpha^1$            | $1S^2 1P_\alpha^3 1P_\beta^2 1D_\alpha^1$ |
| 4  | $1S^2 1P_\alpha^3 1D_\beta^2$                          | $1S^2 1P_\alpha^3 1P_\beta^1$                                                                       | $1S^2 1P^6 1D_\alpha^2$            | $1S^2 1P^6 1D_\alpha^1$                   |
| 5  | $1S^2 1P^6$                                            | $1S^2 1P_\alpha^3 1P_\beta^2$                                                                       | $1S^2 1P^6 1D_\alpha^3$            | $1S^2 1P^6 1D_\alpha^2$                   |
| 6  | $1S^2 1P^6 1D_\alpha^1$                                | $1S^2 1P^6$                                                                                         | $1S^2 1P^6 1D_\alpha^3 1D_\beta^1$ | $1S^2 1P^6 1D_\alpha^3$                   |
| 7  | $1S^2 1P^6 1D_\alpha^2$                                | $1S^2 1P^6 1D_\alpha^1$                                                                             | $1S^2 1P^6 1D_\alpha^3 1D_\beta^2$ | $1S^2 1P^6 1D_\alpha^3 1D_\beta^1$        |
| 8  | $1S^2 1P^6 1D_\alpha^2 1D_\beta^1$                     | $1S^2 1P^6 1D_\alpha^2$                                                                             | $1S^2 1P^6 1D_\alpha^4 1D_\beta^2$ | $1S^2 1P^6 1D_\alpha^3 1D_\beta^2$        |
| 9  | $1S^2 1P^6 1D^4$                                       | $1S^2 1P^6 1D_\alpha^2 1D_\beta^1$                                                                  | $1S^2 1P^6 1D_\alpha^5 1D_\beta^2$ | $1S^2 1P^6 1D_\alpha^4 1D_\beta^2$        |
| 10 | $1S^2 1P^6 1D_\alpha^3 1D_\beta^2$                     | $1S^2 1P^6 1D_\alpha^3 1D_\beta^1$                                                                  | $1S^2 1P^6 1D^8$                   | $1S^2 1P^6 1D_\alpha^5 1D_\beta^2$        |
| 11 | $1S^2 1P^6 1D_\alpha^4 1D_\beta^2$                     | $1S^2 1P^6 1D_\alpha^3 1D_\beta^2$                                                                  | $1S^2 1P^6 1D_\alpha^5 1D_\beta^4$ | $1S^2 1P^6 1D_\alpha^5 1D_\beta^3$        |
| 12 | $1S^2 1P^6 1D_\alpha^5 1D_\beta^3$                     | $1S^2 1P^6 1D_\alpha^5 1D_\beta^1$                                                                  | $1S^2 1P^6 1D^{10}$                | $1S^2 1P^6 1D_\alpha^5 1D_\beta^4$        |
| 13 | $1S^2 1P^6 1D_\alpha^5 1D_\beta^3$                     | $1S^2 1P^6 1D_\alpha^5 1D_\beta^2$                                                                  |                                    |                                           |
| 14 | $1S^2 1P^6 1D_\alpha^5 1D_\beta^4$                     | $1S^2 1P^6 1D^8$                                                                                    |                                    |                                           |
| 15 | $1S^2 1P^6 1D^{10}$                                    | $1S^2 1P^6 1D_\alpha^5 1D_\beta^4$                                                                  |                                    |                                           |
| 16 | $1S^2 1P^6 1D^{10} 2S_\alpha^1$                        | $1S^2 1P^6 1D^{10}$                                                                                 |                                    |                                           |
| 17 | $1S^2 1P^6 1D^{10} 2S^2$                               | $1S^2 1P^6 1D^{10} 2S_\alpha^1$                                                                     |                                    |                                           |
| 18 | $1S^2 1P^6 1D^{10} 1F_\alpha^1 1F_\beta^1 2S_\alpha^1$ | $1S^2 1P^6 1D^{10} 1F^2$                                                                            |                                    |                                           |
| 19 | $1S^2 1P^6 1D^{10} 2S^2 1F^2$                          | $1S^2 1P^6 1D^{10} 2S^2 1F_\alpha^1$                                                                |                                    |                                           |
| 20 | $1S^2 1P^6 1D^{10} 2S^2 1F_\alpha^1 1F_\beta^1$        | $1S^2 1P^6 1D^{10} 2S^2 1F^2$                                                                       |                                    |                                           |
| 21 | $1S^2 1P^6 1D^{10} 1F_\alpha^3 1F_\beta^3 2S_\alpha^1$ | $1S^2 1P^6 1D^{10} 1F_\alpha^3 1F_\beta^2$                                                          |                                    |                                           |
| 22 | $1S^2 1P^6 1D^{10} 1F_\alpha^3 1F_\beta^3 2S_\alpha^1$ | $1S^2 1P^6 1D^{10} 1F_\alpha^3 1F_\beta^2 2S_\alpha^1$                                              |                                    |                                           |
| 23 | $1S^2 1P^6 1D^8 1F^2 1D^2 1F^4 2S^2$                   | $1S^2 1P^6 1D_\alpha^4 1D_\beta^4 1F_\alpha^1 1F_\beta^1$                                           |                                    |                                           |
| 24 | $1S^2 1P^6 1D^{10} 2S^2 1F_\alpha^5 1F_\beta^2$        | $1D_\alpha^1 1D_\beta^1 1F_\alpha^2 1F_\beta^2 2S_\alpha^1$<br>$1S^2 1P^6 1D^8 1F^2 1D^2 1F^4 2S^2$ |                                    |                                           |

Table S3 Cartesian coordinates of the  $YLi$  cluster

| Energy: -45.80041 |          |          |          |
|-------------------|----------|----------|----------|
| Multiplicity: 3   |          |          |          |
| Atom              | x        | y        | z        |
| Y                 | 0.000000 | 0.000000 | 0.000000 |
| Li                | 0.000000 | 0.000000 | 3.113904 |

Table S4 Cartesian coordinates of the  $YLi_2$  cluster

| Energy: -53.33777 |          |          |          |
|-------------------|----------|----------|----------|
| Multiplicity: 2   |          |          |          |
| Atom              | x        | y        | z        |
| Y                 | 0.000000 | 0.000000 | 0.000000 |
| Li                | 0.000000 | 0.000000 | 3.287104 |
| Li                | 2.519105 | 0.000000 | 2.111643 |

Table S5 Cartesian coordinates of the  $YLi_3$  cluster

| Energy: -60.88328 |          |           |          |
|-------------------|----------|-----------|----------|
| Multiplicity: 3   |          |           |          |
| Atom              | x        | y         | z        |
| Y                 | 0.000000 | 0.000000  | 0.000000 |
| Li                | 0.000000 | 0.000000  | 3.213408 |
| Li                | 2.519891 | 0.000000  | 1.996074 |
| Li                | 0.976556 | -2.330523 | 1.987543 |

Table S6 Cartesian coordinates of the YLi<sub>4</sub> cluster

---

Energy: -68.42978  
 Multiplicity: 2

| Atom | x         | y        | z        |
|------|-----------|----------|----------|
| Y    | 0.000000  | 0.000000 | 0.000000 |
| Li   | 0.000000  | 0.000000 | 3.184437 |
| Li   | 2.604989  | 0.000000 | 1.939947 |
| Li   | 0.861556  | 2.300006 | 2.033438 |
| Li   | -1.963004 | 1.712432 | 1.935585 |

Table S7 Cartesian coordinates of the YLi<sub>5</sub> cluster

---

Energy: -75.97492  
 Multiplicity: 1

| Atom | x         | y        | z         |
|------|-----------|----------|-----------|
| Y    | 0.000000  | 0.000000 | 0.000000  |
| Li   | 0.000000  | 0.000000 | 3.154598  |
| Li   | 2.731973  | 0.000000 | 1.570342  |
| Li   | 1.575470  | 2.231541 | 2.727397  |
| Li   | -0.912486 | 2.576616 | 1.571898  |
| Li   | 1.817957  | 2.569250 | -0.008223 |

Table S8 Cartesian coordinates of the YLi<sub>6</sub> cluster

---

Energy: -83.52426  
 Multiplicity: 2

| Atom | x         | y        | z         |
|------|-----------|----------|-----------|
| Y    | 0.000000  | 0.000000 | 0.000000  |
| Li   | 0.000000  | 0.000000 | 3.151338  |
| Li   | 2.599418  | 0.000000 | 1.788474  |
| Li   | 1.042560  | 2.417919 | 1.979114  |
| Li   | -1.796088 | 1.934152 | 1.803882  |
| Li   | 2.506828  | 1.932136 | -0.458730 |
| Li   | -0.253974 | 3.178579 | -0.486793 |

Table S9 Cartesian coordinates of the YLi<sub>7</sub> cluster

---

Energy: -91.06322  
 Multiplicity: 3

| Atom | x        | y         | z         |
|------|----------|-----------|-----------|
| Y    | 0.000000 | 0.000000  | 0.000000  |
| Li   | 0.000000 | 0.000000  | 3.167008  |
| Li   | 1.572784 | 0.000000  | -2.838192 |
| Li   | 1.048227 | -2.431560 | 1.759649  |
| Li   | 2.614010 | -0.013057 | 1.907005  |
| Li   | 2.731922 | -1.500222 | -0.603315 |
| Li   | 1.076534 | 2.421002  | 1.765096  |
| Li   | 2.753623 | 1.481419  | -0.602456 |

Table S10 Cartesian coordinates of the YLi<sub>8</sub> cluster

---

Energy: -98.61077  
 Multiplicity: 2

| Atom | x         | y         | z         |
|------|-----------|-----------|-----------|
| Y    | 0.000000  | 0.000000  | 0.000000  |
| Li   | 0.000000  | 0.000000  | 3.124059  |
| Li   | 3.041028  | 0.000000  | -0.714269 |
| Li   | 2.214585  | -1.452354 | 1.815449  |
| Li   | 2.274973  | 1.455730  | 1.736436  |
| Li   | -0.288403 | 2.676895  | 1.698799  |
| Li   | 1.582832  | -2.676957 | -0.670926 |
| Li   | 1.660100  | 2.721083  | -0.747988 |
| Li   | -0.339183 | -2.722176 | 1.793383  |

Table S11 Cartesian coordinates of the YLi<sub>9</sub> cluster

---

Energy: -106.15818  
 Multiplicity: 1

| Atom | x         | y         | z         |
|------|-----------|-----------|-----------|
| Y    | 0.000000  | 0.000000  | 0.000000  |
| Li   | 0.000000  | 0.000000  | 3.120862  |
| Li   | 2.956442  | 0.000000  | -0.999616 |
| Li   | 2.421144  | -1.123038 | 1.732116  |
| Li   | 1.596656  | -2.658563 | -0.705804 |
| Li   | -0.146099 | -2.664697 | 1.733376  |
| Li   | -1.388683 | -2.609553 | -0.999331 |
| Li   | 2.204990  | 1.655614  | 1.580809  |
| Li   | -2.498147 | -1.168643 | 1.582134  |
| Li   | 0.690876  | -1.165061 | -2.880308 |

Table S12 Cartesian coordinates of the YLi<sub>10</sub> cluster

---

Energy: -113.70363  
 Multiplicity: 2

| Atom | x         | y         | z         |
|------|-----------|-----------|-----------|
| Y    | 0.000000  | 0.000000  | 0.000000  |
| Li   | 0.000000  | 0.000000  | 3.112168  |
| Li   | 3.086608  | 0.000000  | -0.793577 |
| Li   | 2.294688  | -1.439297 | 1.691240  |
| Li   | 2.149717  | 1.533695  | 1.782896  |
| Li   | 1.615961  | 2.580938  | -0.950285 |
| Li   | 1.521145  | -2.491315 | -1.075964 |
| Li   | 1.047778  | 0.302901  | -2.914435 |
| Li   | -0.474758 | 2.798194  | 1.270397  |
| Li   | -1.008239 | 2.451688  | -1.834322 |
| Li   | -0.126251 | -2.788702 | 1.610381  |

Table S13 Cartesian coordinates of the YLi<sub>11</sub> cluster

| Energy: -121.25287 |           |           |           |
|--------------------|-----------|-----------|-----------|
| Multiplicity: 3    |           |           |           |
| Atom               | x         | y         | z         |
| Y                  | 0.000000  | 0.000000  | 0.000000  |
| Li                 | 0.000000  | 0.000000  | 3.114050  |
| Li                 | 2.701044  | 0.000000  | 1.539260  |
| Li                 | -2.021989 | 1.780927  | 1.559964  |
| Li                 | 2.337374  | 1.802149  | -0.981485 |
| Li                 | 0.999317  | -2.408667 | 1.706859  |
| Li                 | 0.320027  | 0.920205  | -2.961997 |
| Li                 | -0.582762 | 2.899951  | -0.956390 |
| Li                 | 2.644741  | -1.130404 | -1.195158 |
| Li                 | -2.338691 | -1.156511 | 1.707653  |
| Li                 | -2.748869 | 0.895708  | -1.167511 |
| Li                 | 0.958964  | 2.536364  | 1.678684  |

Table S14 Cartesian coordinates of the YLi<sub>12</sub> cluster

| Energy: -128.80121 |           |           |           |
|--------------------|-----------|-----------|-----------|
| Multiplicity: 4    |           |           |           |
| Atom               | x         | y         | z         |
| Y                  | 0.000000  | 0.000000  | 0.000000  |
| Li                 | 0.000000  | 0.000000  | 3.040451  |
| Li                 | 0.000000  | 0.018252  | -3.039814 |
| Li                 | -0.636805 | -2.627101 | 1.390257  |
| Li                 | -2.693089 | -0.228318 | 1.392095  |
| Li                 | 0.635690  | 2.634453  | -1.382258 |
| Li                 | 2.695327  | 0.234746  | -1.386172 |
| Li                 | 2.272601  | -1.451072 | 1.464296  |
| Li                 | -2.272867 | 1.461804  | -1.457016 |
| Li                 | -1.105564 | 2.467084  | 1.467076  |
| Li                 | 1.112187  | -2.459846 | -1.470929 |
| Li                 | 2.121790  | 1.831141  | 1.248436  |
| Li                 | -2.127791 | -1.826362 | -1.242336 |

Table S15 Cartesian coordinates of the YLi<sub>13</sub> cluster

| Energy: -136.35398 |           |           |           |
|--------------------|-----------|-----------|-----------|
| Multiplicity: 3    |           |           |           |
| Atom               | x         | y         | z         |
| Y                  | 0.000000  | 0.000000  | 0.000000  |
| Li                 | 0.000000  | 0.000000  | 2.980566  |
| Li                 | 0.000000  | 0.268687  | -3.039772 |
| Li                 | -2.946678 | -0.124096 | 1.115565  |
| Li                 | 2.945541  | 0.015224  | 1.123598  |
| Li                 | -2.511099 | 1.185810  | -1.472727 |
| Li                 | 2.457457  | 1.304644  | -1.464915 |
| Li                 | 1.477681  | 2.519227  | 1.279887  |
| Li                 | -1.599207 | 2.445324  | 1.276117  |
| Li                 | -0.065521 | 2.841275  | -1.362913 |
| Li                 | -1.392569 | -2.420843 | 1.579574  |
| Li                 | 1.502988  | -2.355633 | 1.577502  |
| Li                 | -2.167031 | -1.769034 | -1.414850 |
| Li                 | 2.254321  | -1.661879 | -1.410788 |

Table S16 Cartesian coordinates of the YLi<sub>14</sub> cluster

---

Energy: -143.91667  
 Multiplicity: 2

| Atom | x         | y         | z         |
|------|-----------|-----------|-----------|
| Y    | 0.000000  | 0.000000  | 0.000000  |
| Li   | 0.000000  | 0.000000  | 2.997817  |
| Li   | 0.000000  | -0.002353 | -2.998133 |
| Li   | 1.541397  | -2.306817 | -1.512549 |
| Li   | -0.125959 | 2.775236  | 1.506584  |
| Li   | -2.526500 | 1.192508  | 1.482949  |
| Li   | -1.326678 | -2.477948 | -1.460599 |
| Li   | 2.832068  | 0.254714  | -1.417663 |
| Li   | 2.442578  | 1.504046  | 1.383784  |
| Li   | -2.385221 | -1.669544 | 1.324447  |
| Li   | -2.937021 | -0.103420 | -1.280742 |
| Li   | 1.285595  | 2.682998  | -1.216169 |
| Li   | 2.660269  | -1.376362 | 1.176590  |
| Li   | 0.198883  | -3.007801 | 1.131937  |
| Li   | -1.655589 | 2.526330  | -1.114546 |

Table S17 Cartesian coordinates of the YLi<sub>15</sub> cluster

---

Energy: -151.47513  
 Multiplicity: 1

| Atom | x         | y         | z         |
|------|-----------|-----------|-----------|
| Y    | 0.000000  | 0.000000  | 0.000000  |
| Li   | 0.000000  | 0.000000  | 3.075357  |
| Li   | 2.662434  | 0.000000  | -1.537289 |
| Li   | -2.662376 | -0.002313 | -1.536606 |
| Li   | -0.000663 | 1.377075  | -2.911943 |
| Li   | 0.000016  | -1.378365 | -2.911759 |
| Li   | -2.520955 | 1.376038  | 1.453573  |
| Li   | -2.519027 | -1.378770 | 1.455703  |
| Li   | 2.518732  | 1.379109  | 1.454418  |
| Li   | 2.520655  | -1.376165 | 1.454285  |
| Li   | -1.514580 | 2.749367  | -0.875284 |
| Li   | 0.001771  | -2.753510 | 1.746710  |
| Li   | 1.515157  | -2.748340 | -0.875122 |
| Li   | 1.511713  | 2.750304  | -0.874895 |
| Li   | -0.001765 | 2.753573  | 1.747829  |
| Li   | -1.513266 | -2.749733 | -0.874789 |

Table S18 Cartesian coordinates of the YLi<sub>16</sub> cluster

| Energy: -159.01918 |           |           |           |
|--------------------|-----------|-----------|-----------|
| Multiplicity: 2    |           |           |           |
| Atom               | x         | y         | z         |
| Y                  | 0.000000  | 0.000000  | 0.000000  |
| Li                 | 0.000000  | 0.000000  | 3.128304  |
| Li                 | 2.952390  | 0.000000  | -1.036688 |
| Li                 | -1.471732 | 2.554501  | -1.044847 |
| Li                 | -1.471830 | -2.552823 | -1.046551 |
| Li                 | -0.022755 | 2.819481  | 1.740693  |
| Li                 | -2.434878 | 1.431840  | 1.731418  |
| Li                 | 1.630574  | 2.822739  | -0.595062 |
| Li                 | 0.835980  | 1.431060  | -2.871910 |
| Li                 | -1.646647 | 0.007573  | -2.875071 |
| Li                 | -3.253208 | -0.005477 | -0.603530 |
| Li                 | -2.434802 | -1.428952 | 1.740372  |
| Li                 | -0.025061 | -2.826571 | 1.730397  |
| Li                 | 2.450089  | -1.391555 | 1.740053  |
| Li                 | 2.457613  | 1.391433  | 1.738044  |
| Li                 | 1.633964  | -2.819929 | -0.601009 |
| Li                 | 0.827816  | -1.428708 | -2.873133 |

Table S19 Cartesian coordinates of the YLi<sub>17</sub> cluster

| Energy: -166.55270 |           |           |           |
|--------------------|-----------|-----------|-----------|
| Multiplicity: 1    |           |           |           |
| Atom               | x         | y         | z         |
| Y                  | 0.000000  | 0.000000  | 0.000000  |
| Li                 | 0.000000  | 0.000000  | 3.175112  |
| Li                 | 2.785055  | 0.000000  | 1.524552  |
| Li                 | -0.987954 | -2.608950 | 1.519831  |
| Li                 | 1.803028  | -2.609170 | -0.127487 |
| Li                 | -0.388965 | 3.161334  | -0.669233 |
| Li                 | -1.654746 | -0.213663 | -2.798557 |
| Li                 | -2.827916 | 1.478999  | -0.667597 |
| Li                 | 0.781066  | 1.472564  | -2.803666 |
| Li                 | 1.613421  | -2.343041 | 2.730459  |
| Li                 | -1.619473 | 2.335176  | 1.857944  |
| Li                 | -2.690923 | -0.252824 | 1.987945  |
| Li                 | 1.181379  | 2.430617  | 1.986509  |
| Li                 | 2.411281  | 2.339328  | -0.534601 |
| Li                 | 3.038130  | -0.254994 | -1.402283 |
| Li                 | -3.041729 | -1.433673 | -0.534086 |
| Li                 | -0.833907 | -2.933020 | -1.404537 |
| Li                 | 0.995142  | -1.439076 | -2.921034 |

Table S20 Cartesian coordinates of the YLi<sub>18</sub> cluster

| Energy: -174.08305 |           |           |           |
|--------------------|-----------|-----------|-----------|
| Multiplicity: 2    |           |           |           |
| Atom               | x         | y         | z         |
| Y                  | 0.000000  | 0.000000  | 0.000000  |
| Li                 | 0.000000  | 0.000000  | 3.131870  |
| Li                 | 1.807404  | 0.000000  | -2.560616 |
| Li                 | 0.538880  | -2.643306 | 1.596766  |
| Li                 | 1.257663  | 2.683678  | -1.011907 |
| Li                 | -3.000720 | -0.062733 | -0.955761 |
| Li                 | 3.027099  | -1.182448 | 0.228901  |
| Li                 | 3.843326  | 1.241998  | -0.798885 |
| Li                 | 2.535956  | 1.239169  | 1.621626  |
| Li                 | 2.753284  | -1.162478 | 2.981996  |
| Li                 | 1.195165  | -2.720666 | -1.372663 |
| Li                 | 0.083396  | 2.739197  | 1.791572  |
| Li                 | -0.769349 | 1.479215  | -2.841255 |
| Li                 | -1.743147 | 2.764471  | -0.501996 |
| Li                 | -0.905497 | -1.354285 | -2.880927 |
| Li                 | -1.617745 | -2.843600 | -0.555672 |
| Li                 | -2.235430 | -1.550006 | 1.880533  |
| Li                 | -2.455573 | 1.270623  | 1.826687  |
| Li                 | 5.390060  | 0.100466  | 1.750251  |

Table S21 Cartesian coordinates of the YLi<sub>19</sub> cluster

| Energy: -181.61820 |           |           |           |
|--------------------|-----------|-----------|-----------|
| Multiplicity: 1    |           |           |           |
| Atom               | x         | y         | z         |
| Y                  | 0.000000  | 0.000000  | 0.000000  |
| Li                 | 0.000000  | 0.000000  | 3.092261  |
| Li                 | 2.680434  | 0.000000  | 1.543685  |
| Li                 | -2.271839 | 1.953528  | -0.939055 |
| Li                 | 0.314998  | 1.961354  | -2.435824 |
| Li                 | -0.619728 | -2.915021 | -1.083106 |
| Li                 | 1.002927  | -2.534212 | 1.724485  |
| Li                 | -1.810364 | -2.146353 | 1.760688  |
| Li                 | 2.438640  | -2.136608 | -0.694244 |
| Li                 | -1.677342 | -0.018722 | -2.905521 |
| Li                 | 1.021390  | -1.008614 | -2.913430 |
| Li                 | -3.029869 | -1.018384 | -0.574250 |
| Li                 | 1.736958  | 2.780534  | 0.297109  |
| Li                 | -0.623782 | 2.778230  | 1.658263  |
| Li                 | 1.747596  | 2.521264  | 3.031749  |
| Li                 | -2.646611 | 0.678394  | 1.812496  |
| Li                 | 2.890555  | 0.691320  | -1.384459 |
| Li                 | -0.501938 | 4.228178  | -0.851685 |
| Li                 | -2.043568 | 3.334935  | -3.517100 |
| Li                 | 1.022661  | 5.328966  | 1.794022  |



Table S22 Cartesian coordinates of the YLi<sub>20</sub> cluster

| Energy: -189.15416 |           |           |           |
|--------------------|-----------|-----------|-----------|
| Multiplicity: 2    |           |           |           |
| Atom               | x         | y         | z         |
| Y                  | 0.000000  | 0.000000  | 0.000000  |
| Li                 | 0.000000  | 0.000000  | 3.281257  |
| Li                 | 3.055756  | 0.000000  | -0.712563 |
| Li                 | -0.768844 | -2.554956 | 1.659098  |
| Li                 | -3.209725 | 0.302364  | -0.717670 |
| Li                 | -2.598865 | -0.091514 | 1.972309  |
| Li                 | -3.704343 | -2.118200 | 0.527281  |
| Li                 | -1.408840 | 0.139680  | -2.948367 |
| Li                 | -3.301333 | 2.469314  | 1.072185  |
| Li                 | -4.500703 | 3.143834  | -1.195505 |
| Li                 | -1.401190 | 2.622056  | -1.130710 |
| Li                 | -0.551501 | 2.602358  | 1.743040  |
| Li                 | 1.390406  | 3.013892  | -0.296048 |
| Li                 | 1.142597  | 1.516419  | -2.656588 |
| Li                 | 1.135704  | -1.364135 | -2.793142 |
| Li                 | -1.386498 | -2.431475 | -1.356431 |
| Li                 | 2.277233  | 1.392041  | 1.909248  |
| Li                 | 2.147229  | -1.491785 | 1.926619  |
| Li                 | 1.436026  | -2.895045 | -0.402321 |
| Li                 | -5.602769 | 0.608750  | 0.772171  |
| Li                 | -2.193763 | 4.998928  | 0.144516  |

Table S23 Cartesian coordinates of the YLi<sub>21</sub> cluster

| Energy: -196.70029 |           |           |           |
|--------------------|-----------|-----------|-----------|
| Multiplicity: 3    |           |           |           |
| Atom               | x         | y         | z         |
| Li                 | 0.000000  | 0.000000  | 0.000000  |
| Li                 | 0.000000  | 0.000000  | 2.686523  |
| Li                 | 2.571513  | 0.000000  | 0.851906  |
| Li                 | -1.466455 | 1.511358  | -1.671485 |
| Li                 | -1.378467 | -1.906598 | -1.404415 |
| Li                 | -2.552239 | 0.111753  | 0.972742  |
| Li                 | 1.492752  | 2.062270  | -1.108649 |
| Li                 | -0.672562 | 2.478574  | 0.975566  |
| Li                 | -0.603693 | -2.517756 | 1.251330  |
| Y                  | 1.935540  | -2.802390 | -0.751596 |
| Li                 | 4.692460  | -3.919344 | -1.700251 |
| Li                 | -0.373717 | -4.881151 | -1.225262 |
| Li                 | 2.167432  | -2.399978 | 2.410237  |
| Li                 | 3.912023  | -0.416935 | -1.728870 |
| Li                 | 3.084148  | -2.238929 | -3.761124 |
| Li                 | 4.796324  | -1.895889 | 0.625040  |
| Li                 | 1.026220  | -0.331768 | -2.641370 |
| Li                 | 3.885846  | -4.566503 | 1.260791  |
| Li                 | 2.547757  | -6.087492 | -0.691529 |
| Li                 | 2.202195  | -4.948691 | -3.195004 |
| Li                 | 0.188008  | -2.972197 | -3.602587 |
| Li                 | 0.932384  | -4.967456 | 1.484371  |

Table S24 Cartesian coordinates of the YLi<sub>22</sub> cluster

---

Energy: -204.24567  
 Multiplicity: 2

| Atom | x         | y         | z         |
|------|-----------|-----------|-----------|
| Li   | 0.000000  | 0.000000  | 0.000000  |
| Li   | 0.000000  | 0.000000  | 4.610408  |
| Y    | 2.358346  | 0.000000  | 2.302700  |
| Li   | -0.738033 | -1.351851 | 2.300054  |
| Li   | 1.408685  | -2.685717 | 3.806914  |
| Li   | 1.969711  | 2.160864  | 4.722094  |
| Li   | 1.452353  | -2.715558 | 0.857907  |
| Li   | 5.314237  | 2.678022  | 2.290734  |
| Li   | 4.789067  | 4.049561  | 4.569916  |
| Li   | 4.789099  | 4.078841  | 0.025671  |
| Li   | 4.659682  | 1.028137  | 0.167144  |
| Li   | 4.668651  | 1.015683  | 4.412616  |
| Li   | 2.616491  | -0.650040 | -0.972354 |
| Li   | -0.091844 | 1.957822  | 2.305320  |
| Li   | 6.217849  | -0.020081 | 2.295468  |
| Li   | 7.480066  | 2.647130  | 0.763440  |
| Li   | 2.635081  | -0.633915 | 5.577487  |
| Li   | 4.366756  | -2.065804 | 3.705931  |
| Li   | 2.725151  | 3.339387  | 2.298890  |
| Li   | 6.445778  | 5.105955  | 2.305186  |
| Li   | 4.398766  | -2.036104 | 0.866729  |
| Li   | 7.485030  | 2.637884  | 3.815534  |
| Li   | 1.964282  | 2.166210  | -0.123899 |

Table S25 Cartesian coordinates of the YLi<sub>23</sub> cluster

---

Energy: -211.78860  
 Multiplicity: 1

| Atom | x         | y         | z         |
|------|-----------|-----------|-----------|
| Y    | 0.000000  | 0.000000  | 0.000000  |
| Li   | 0.000000  | 0.000000  | 3.129251  |
| Li   | 2.814306  | 0.000000  | 1.374235  |
| Li   | 0.338088  | -1.231952 | -2.883457 |
| Li   | -2.741064 | -1.223906 | -0.939944 |
| Li   | 1.755076  | 2.628931  | -0.152216 |
| Li   | -0.916691 | 2.651833  | 1.506424  |
| Li   | 1.624327  | 2.472077  | 2.594864  |
| Li   | -0.413371 | -3.186252 | -0.659547 |
| Li   | -1.662067 | -2.282047 | 1.784762  |
| Li   | -2.719171 | 0.334499  | 1.918261  |
| Li   | -2.819945 | 1.753441  | -0.480527 |
| Li   | -1.800118 | 0.916042  | -2.891129 |
| Li   | 0.817328  | 1.726764  | -2.766814 |
| Li   | 2.927593  | 0.353761  | -1.604011 |
| Li   | -0.813852 | 3.546590  | -1.373117 |
| Li   | -1.174066 | 6.181452  | -2.039818 |
| Li   | 2.337306  | -2.272197 | -0.736928 |
| Li   | 1.192584  | -2.440025 | 1.884533  |
| Li   | -2.642895 | 4.906523  | 0.231065  |
| Li   | 1.477597  | 4.832797  | -2.314789 |
| Li   | -3.283581 | 3.977497  | -2.582659 |
| Li   | -0.789918 | 3.970695  | -4.140804 |
| Li   | 0.403774  | 5.252623  | 0.566413  |

Table S26 Cartesian coordinates of the YLi<sub>24</sub> cluster

---

Energy: -219.33082  
 Multiplicity: 4

| Atom | x         | y         | z         |
|------|-----------|-----------|-----------|
| Li   | 2.793740  | 3.803472  | 0.391262  |
| Li   | 2.963148  | -2.325233 | 2.696200  |
| Li   | -2.973626 | 2.371030  | 0.108376  |
| Li   | -2.576310 | -2.777307 | -0.459632 |
| Li   | 1.976494  | 1.362221  | -0.368911 |
| Li   | 3.288852  | -3.445854 | -0.199040 |
| Li   | -0.105609 | 3.041259  | -1.086726 |
| Li   | -2.023188 | -1.931043 | 2.407579  |
| Li   | 3.167292  | 1.018168  | 2.123147  |
| Li   | 0.229151  | -3.050229 | 1.026284  |
| Li   | 0.214212  | 2.361321  | 1.687685  |
| Li   | 0.512896  | -0.400037 | 2.710280  |
| Li   | -2.044423 | 1.650647  | -2.685720 |
| Li   | 2.117506  | -1.129341 | 0.473514  |
| Li   | 0.684973  | 0.462799  | -2.759378 |
| Li   | -3.983427 | -0.121539 | -1.597895 |
| Li   | 2.831889  | 2.686432  | -2.519188 |
| Li   | 0.668609  | -2.329705 | -1.722113 |
| Li   | -4.085393 | -0.454875 | 1.139039  |
| Li   | 4.911852  | -1.101457 | 0.756536  |
| Li   | 4.768619  | 1.700270  | -0.439449 |
| Li   | -2.185644 | 1.067465  | 2.774476  |
| Y    | -1.063381 | -0.079362 | -0.096064 |
| Li   | 3.417627  | -0.616856 | -1.927605 |
| Li   | -1.761840 | -1.337532 | -3.056324 |

Table S27 Cartesian coordinates of the Y<sub>2</sub>Li cluster

---

Energy: -84.15872  
 Multiplicity: 2

| Atom | x        | y        | z        |
|------|----------|----------|----------|
| Y    | 0.000000 | 0.000000 | 0.000000 |
| Y    | 0.000000 | 0.000000 | 3.201230 |
| Li   | 2.729101 | 0.000000 | 1.593055 |

Table S28 Cartesian coordinates of the Y<sub>2</sub>Li<sub>2</sub> cluster

---

Energy: -91.71077  
 Multiplicity: 1

| Atom | x        | y        | z        |
|------|----------|----------|----------|
| Y    | 0.000000 | 0.000000 | 0.000000 |
| Y    | 0.000000 | 0.000000 | 3.194763 |
| Li   | 2.697361 | 0.000000 | 1.594187 |
| Li   | 1.068785 | 2.480639 | 1.598267 |

Table S29 Cartesian coordinates of the Y<sub>2</sub>Li<sub>3</sub> cluster

---

Energy: -99.26120  
 Multiplicity: 2

| Atom | x        | y         | z        |
|------|----------|-----------|----------|
| Y    | 0.000000 | 0.000000  | 0.000000 |
| Y    | 0.000000 | 0.000000  | 3.219030 |
| Li   | 2.704859 | 0.000000  | 1.612884 |
| Li   | 1.156340 | -2.496877 | 1.610637 |
| Li   | 1.157606 | 2.496870  | 1.610879 |

Table S30 Cartesian coordinates of the Y<sub>2</sub>Li<sub>4</sub> cluster

| Energy: -106.80760 |           |           |          |
|--------------------|-----------|-----------|----------|
| Multiplicity: 3    |           |           |          |
| Atom               | x         | y         | z        |
| Y                  | 0.000000  | 0.000000  | 0.000000 |
| Y                  | 0.000000  | 0.000000  | 3.226185 |
| Li                 | 2.763157  | 0.000000  | 1.614236 |
| Li                 | 1.175096  | 2.500642  | 1.615083 |
| Li                 | -1.745056 | 2.108929  | 1.611865 |
| Li                 | 1.165865  | -2.476486 | 1.612197 |

Table S31 Cartesian coordinates of the Y<sub>2</sub>Li<sub>5</sub> cluster

| Energy: -114.36121 |           |           |          |
|--------------------|-----------|-----------|----------|
| Multiplicity: 4    |           |           |          |
| Atom               | x         | y         | z        |
| Y                  | 0.000000  | 0.000000  | 0.000000 |
| Y                  | 0.000000  | 0.000000  | 3.282194 |
| Li                 | 2.680729  | 0.000000  | 1.640162 |
| Li                 | -2.159197 | -1.596912 | 1.643779 |
| Li                 | 0.807642  | 2.560795  | 1.642684 |
| Li                 | 0.842097  | -2.547976 | 1.641024 |
| Li                 | -2.189733 | 1.553843  | 1.641305 |

Table S32 Cartesian coordinates of the Y<sub>2</sub>Li<sub>6</sub> cluster

| Energy: -121.90711 |           |           |          |
|--------------------|-----------|-----------|----------|
| Multiplicity: 3    |           |           |          |
| Atom               | x         | y         | z        |
| Y                  | 0.000000  | 0.000000  | 0.000000 |
| Y                  | 0.000000  | 0.000000  | 3.189013 |
| Li                 | 2.785948  | 0.000000  | 1.594065 |
| Li                 | -2.786286 | 0.001664  | 1.594846 |
| Li                 | 1.455474  | -2.494431 | 1.598588 |
| Li                 | -1.446426 | -2.473644 | 1.594785 |
| Li                 | -1.455087 | 2.497289  | 1.597700 |
| Li                 | 1.445214  | 2.478743  | 1.594781 |

Table S33 Cartesian coordinates of the Y<sub>2</sub>Li<sub>7</sub> cluster

| Energy: -129.44566 |           |           |           |
|--------------------|-----------|-----------|-----------|
| Multiplicity: 2    |           |           |           |
| Atom               | x         | y         | z         |
| Y                  | 0.000000  | 0.000000  | 0.000000  |
| Li                 | 0.000000  | 0.000000  | 4.211889  |
| Y                  | 2.355987  | 0.000000  | 2.097952  |
| Li                 | -0.009514 | -2.289944 | 2.302957  |
| Li                 | -0.011504 | 2.287445  | 2.304098  |
| Li                 | 3.054463  | 0.001195  | -1.023000 |
| Li                 | 1.996371  | 2.508101  | 0.118689  |
| Li                 | 2.003791  | -2.507663 | 0.122039  |
| Li                 | -2.056446 | -0.004200 | 2.434576  |

Table S34 Cartesian coordinates of the  $Y_2Li_8$  cluster

---

Energy: -136.99085  
 Multiplicity: 3

| Atom | x         | y         | z         |
|------|-----------|-----------|-----------|
| Y    | 0.000000  | 0.000000  | 0.000000  |
| Y    | 0.000000  | 0.000000  | 3.171342  |
| Li   | 2.882933  | 0.000000  | 1.394191  |
| Li   | -2.868880 | 0.003322  | 1.638231  |
| Li   | 2.736378  | 1.472118  | -1.067071 |
| Li   | 2.733004  | -1.479397 | -1.062921 |
| Li   | 1.445982  | 2.481636  | 1.454133  |
| Li   | -1.426114 | 2.463541  | 1.532413  |
| Li   | 1.437908  | -2.485736 | 1.455577  |
| Li   | -1.432811 | -2.460378 | 1.532509  |

Table S35 Cartesian coordinates of the  $Y_2Li_9$  cluster

---

Energy: -144.53177  
 Multiplicity: 4

| Atom | x         | y         | z         |
|------|-----------|-----------|-----------|
| Y    | 0.000000  | 0.000000  | 0.000000  |
| Y    | 0.000000  | 0.000000  | 3.237304  |
| Li   | 2.728909  | 0.000000  | 1.527685  |
| Li   | 0.632356  | 2.654222  | 1.528089  |
| Li   | 1.065788  | -2.524332 | 1.421658  |
| Li   | -2.207882 | 1.621802  | 1.420604  |
| Li   | 2.431362  | 1.919174  | -0.758938 |
| Li   | -2.118743 | -1.664549 | 1.644980  |
| Li   | -0.483084 | 2.888677  | -1.171979 |
| Li   | 2.697083  | -1.141973 | -1.170463 |
| Li   | 1.079182  | 0.849443  | -2.923501 |

Table S36 Cartesian coordinates of the  $Y_2Li_{10}$  cluster

---

Energy: -152.08424  
 Multiplicity: 1

| Atom | x         | y         | z         |
|------|-----------|-----------|-----------|
| Y    | 0.000000  | 0.000000  | 0.000000  |
| Y    | 0.000000  | 0.000000  | 3.071102  |
| Li   | 2.738900  | 0.000000  | 1.205788  |
| Li   | -2.217029 | -1.606099 | 1.204216  |
| Li   | 0.846325  | 2.603830  | 1.206421  |
| Li   | -2.214784 | 1.609191  | 1.204534  |
| Li   | 0.844568  | -2.602875 | 1.204064  |
| Li   | -2.917162 | 0.002079  | -1.213219 |
| Li   | -0.902531 | -2.774943 | -1.211417 |
| Li   | 2.360308  | -1.715074 | -1.210857 |
| Li   | 2.361352  | 1.713827  | -1.209595 |
| Li   | -0.900834 | 2.773464  | -1.211874 |

Table S37 Cartesian coordinates of the Y<sub>2</sub>Li<sub>11</sub> cluster

| Energy: -159.64730 |          |           |           |
|--------------------|----------|-----------|-----------|
| Multiplicity: 2    |          |           |           |
| Atom               | x        | y         | z         |
| Li                 | 0.000000 | 0.000000  | 0.000000  |
| Li                 | 0.000000 | 0.000000  | 3.235070  |
| Y                  | 2.539055 | 0.000000  | 1.582651  |
| Li                 | 5.194896 | -0.415642 | 3.060260  |
| Li                 | 5.132514 | -0.425737 | -0.065690 |
| Y                  | 1.189540 | 2.741356  | 1.551612  |
| Li                 | 0.858920 | -2.563598 | 1.656079  |
| Li                 | 2.722805 | 1.368271  | -1.050353 |
| Li                 | 2.585233 | -1.750938 | 4.084068  |
| Li                 | 4.516275 | 2.236597  | 1.451154  |
| Li                 | 3.926428 | -2.766727 | 1.532533  |
| Li                 | 2.385830 | -1.784864 | -0.948989 |
| Li                 | 2.963885 | 1.467286  | 4.194771  |

Table S38 Cartesian coordinates of the Y<sub>2</sub>Li<sub>12</sub> cluster

| Energy: -167.20644 |           |           |           |
|--------------------|-----------|-----------|-----------|
| Multiplicity: 1    |           |           |           |
| Atom               | x         | y         | z         |
| Y                  | 0.000000  | 0.000000  | 0.000000  |
| Y                  | 0.000000  | 0.000000  | 3.018251  |
| Li                 | 2.524083  | 0.000000  | -1.685453 |
| Li                 | -0.183110 | 0.042392  | -3.116476 |
| Li                 | 0.540222  | -2.527129 | -1.679627 |
| Li                 | -1.378982 | -2.526750 | 1.091922  |
| Li                 | -2.854259 | 0.073304  | 1.132134  |
| Li                 | -2.334976 | -1.448601 | -1.524124 |
| Li                 | -1.222300 | 2.595184  | 1.106129  |
| Li                 | -2.278941 | 1.574825  | -1.498332 |
| Li                 | 1.680731  | 2.382963  | 1.107827  |
| Li                 | 0.621763  | 2.553741  | -1.633254 |
| Li                 | 2.936600  | -0.116255 | 1.237368  |
| Li                 | 1.503170  | -2.509382 | 1.112045  |
