# Supplementary figures and images for: On the energetic and magnetic stability of neutral and charged lithium clusters doped with one and two yttrium atoms
Source: Royal Society of Chemistry journal article supplement (doi:10.1039/d3cp00128h), 2023-01-01

(a)  ${}^2\text{YLi}_5^-$

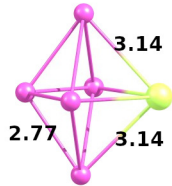

(b)  ${}^2\text{Y}_2\text{Li}_2^-$

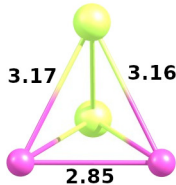

${}^3\text{Y}_2\text{Li}_7^-$

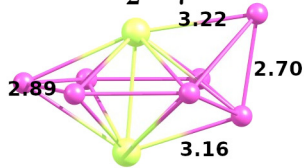

Supplement: d3cp00128h2.zip [file d3cp00128h2.zip]

(a)

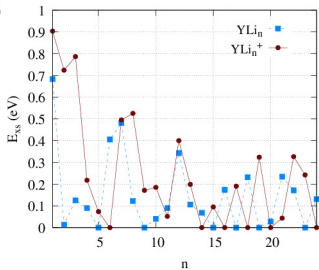

(b)

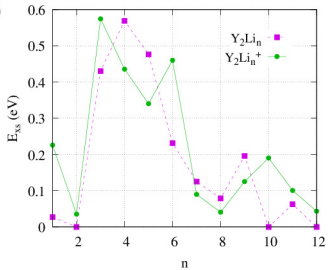

Supplement: d3cp00128h2.zip [file d3cp00128h2.zip]

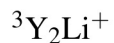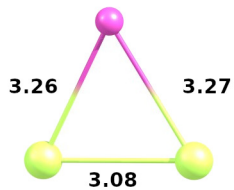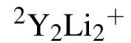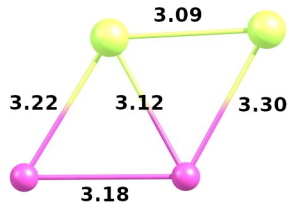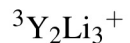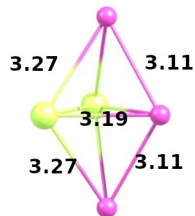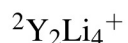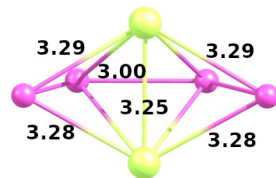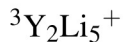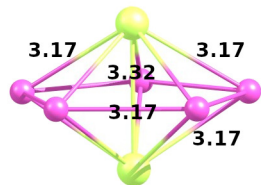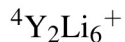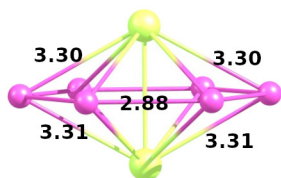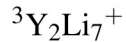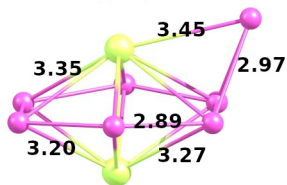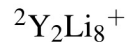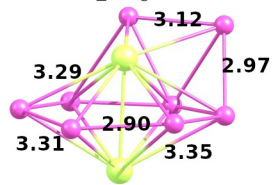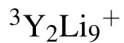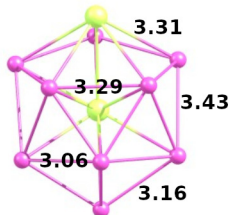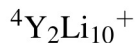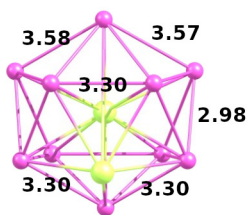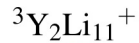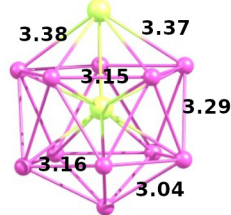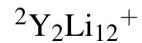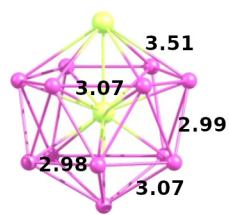

Supplement: d3cp00128h2.zip [file d3cp00128h2.zip]

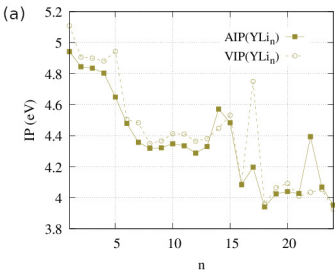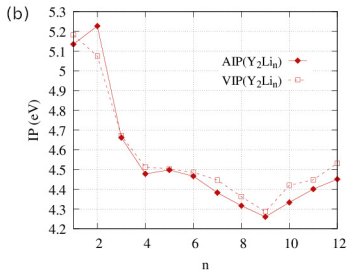

Supplement: d3cp00128h2.zip [file d3cp00128h2.zip]

(a)

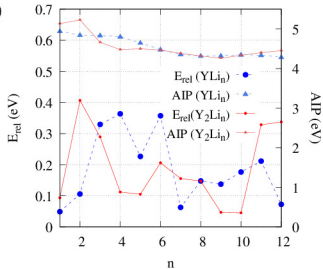

(b)

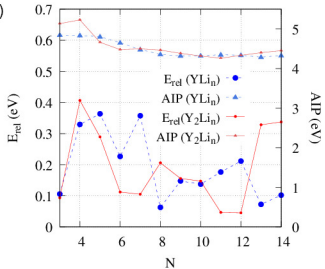

Supplement: d3cp00128h2.zip [file d3cp00128h2.zip]

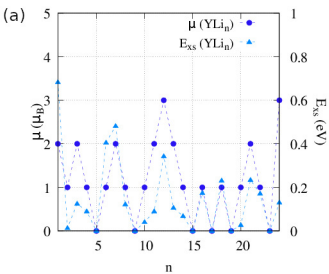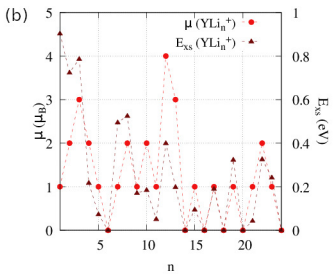

Supplement: d3cp00128h2.zip [file d3cp00128h2.zip]

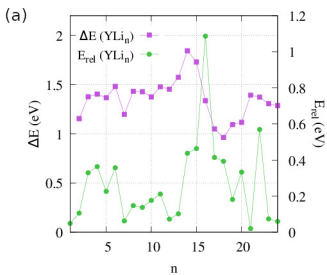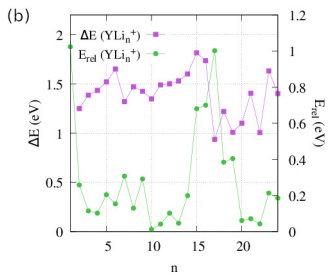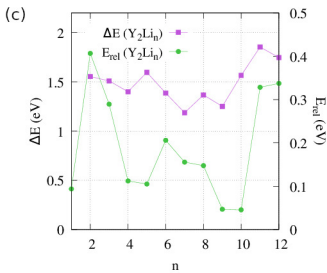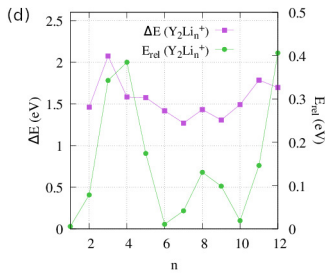

Supplement: d3cp00128h2.zip [file d3cp00128h2.zip]

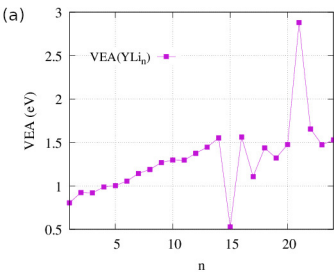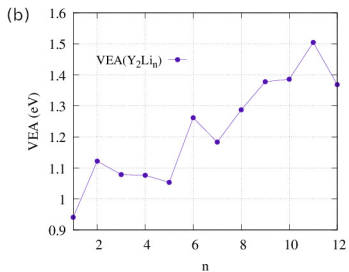

Supplement: d3cp00128h2.zip [file d3cp00128h2.zip]

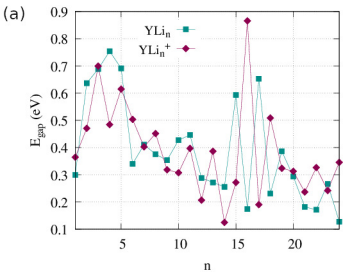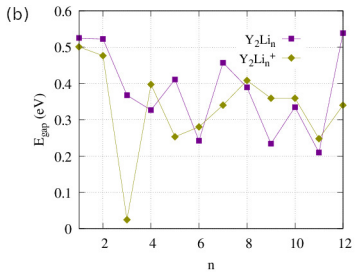

Supplement: d3cp00128h2.zip [file d3cp00128h2.zip]
